# Supplementary material
Source: publisher site journal article supplement (https://www.spandidos-publications.com/8601/downloadSupplementary)

Figure S1. Pancreatic tumors from KPC mice. KPC, LSL-Kras<sup>G12D/+</sup>; TP53<sup>fllox/+</sup>; Pdx1-Cre; Sch B, Schisandrin B.

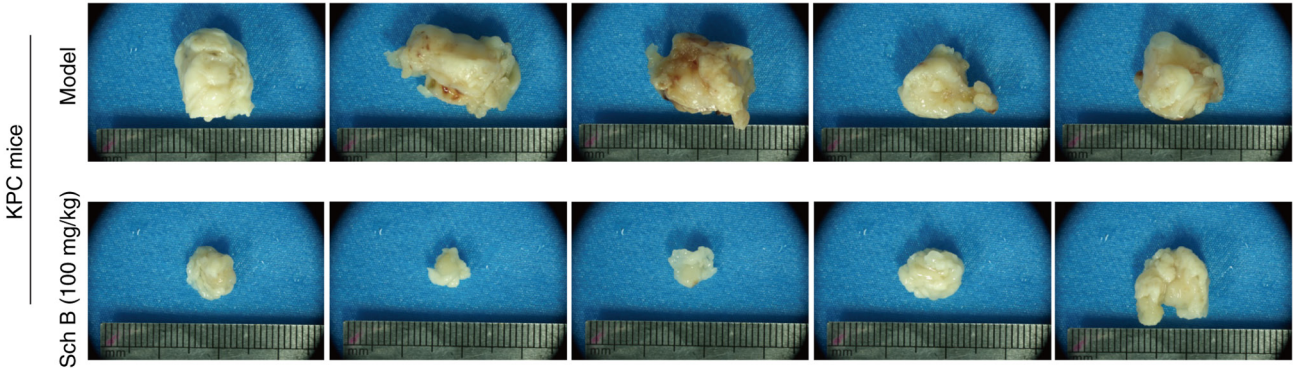

Supplement: Supplementary file 1 [file downloadSupplementary]
